# Supplementary material
Source: PubMed Central journal article supplement (PMC5870609)
Supplement: supplementary_material_btx360.pdf [file supplementary_material_btx360.pdf]

## Supplementary materials for

# **JDINAC: Joint density-based non-parametric differential interaction network analysis and classification using high-dimensional sparse omics data**

Jiadong Ji<sup>1</sup>, Di He<sup>2</sup>, Yang Feng<sup>3</sup>, Yong He<sup>1</sup>, Fuzhong Xue<sup>4</sup>, Lei Xie<sup>2,5,\*</sup>

<sup>1</sup>School of Statistics, Shandong University of Finance and Economics, Jinan, 250014, China.

<sup>2</sup>The Graduate Center, The City University of New York, New York, NY 10016, USA.

<sup>3</sup>Department of Statistics, Columbia University, New York, NY 10027, USA.

<sup>4</sup>Department of Biostatistics, School of Public Health, Shandong University, Jinan, 250012, China.

<sup>5</sup>Department of Computer Science, Hunter College, The City University of New York, New York, NY 10065, USA.

\*To whom correspondence should be addressed: [lxie@iscb.org](mailto:lxie@iscb.org)

## Supplementary Methods

### 1. Simulation study in the non-linear scenario

It is quite difficult to quantify the non-linear relationship in real world scenario. We randomly selected 10 genes from the BRCA data, and described the pairwise scatterplot matrix (Figure S10). The diagonal panel of the matrix is the kernel density curve of individual gene. The  $i$ -th row and  $j$ -th column of the matrix is the pairwise scatter plot and smooth curve fitted by a generalized additive model. Overall, the non-linear relationship among these genes cannot be neglected.

To make our conclusions more convincing, we have simulated other non-linear relationship pattern. The two variables are independent in one group and have exponential relationship in the other group (see Figure S5). The data are generated as follows: In class 0, generate data  $X^{(0)} = (X_1^{(0)}, \dots, X_p^{(0)})$ , where  $X_j^{(0)} = \exp(u_j) + v_j$ ,  $j = 1, \dots, p/2$ ,  $u_j \sim Unif(-2, 2)$  and  $v_j \sim N(0, 2)$ ;  $X_j^{(0)} = u_j$ ,  $j = p/2 + 1, \dots, p$ ,  $p = 100$ . In class 1, generate data  $X^{(1)} = (X_1^{(1)}, \dots, X_p^{(1)})$ , where  $X_j^{(1)} = \exp(u_{j+p/2}) + v_j$ ,  $j = 1, \dots, p/2$ ,  $u_j \sim Unif(-2, 2)$  and  $v_j \sim N(0, 2)$ ;  $X_j^{(1)} = u_j$ ,  $j = p/2 + 1, \dots, p$ ,  $p = 100$ .  $n_1 = n_2 = 300$ . Figure S6 illustrates the ROC curves in this non-linear scenario. JDINAC still performs the best among the 5 methods over 50 simulations. JDINAC still performs the best among the 5 methods.

In the non-linear scenario (scenario 4), the area under the ROC curve (AUROC) is almost 1 due to the joint density of variables are quite different between two groups. We simulated new scenario with reduced difference between class 0 and class 1, through increasing the variance of variables. The data are generated as follows: In class 0, generate data  $X^{(0)} = (X_1^{(0)}, \dots, X_p^{(0)})$ , where  $X_j^{(0)} = u_j^2 + v_j$ ,  $j = 1, \dots, p/2$ ,  $u_j \sim Unif(-2, 2)$  and  $v_j \sim N(-4/3, e)$ ,  $e = 1, 1.5, 2$ ;  $X_j^{(0)} = u_j$ ,  $j = p/2 + 1, \dots, p$ ,  $p = 100$ . In class 1, generate data  $X^{(1)} = (X_1^{(1)}, \dots, X_p^{(1)})$ , where  $X_j^{(1)} = u_{j+p/2}^2 + v_j$ ,  $j = 1, \dots, p/2$ ,  $u_j \sim Unif(-2, 2)$  and  $v_j \sim N(-4/3, e)$ ,  $e = 1, 1.5, 2$ ;  $X_j^{(1)} = u_j$ ,  $j = p/2 + 1, \dots, p$ ,  $p = 100$ .  $n_1 = n_2 = 300$ . Figure S7 illustrates the ROC curves of 5

methods for the classification in the non-linear scenario with different variance over 50 simulations. As expected, Fig. S7(a) showing the highest AUROC followed by Fig. S7(b), (c). The proposed method JDINAC still has more advantageous performance than the other four.

## 2. Simulation study in the cases of multidimensional outliers

To evaluate the model performance in the cases of multidimensional outliers, we generated data with missing in one group. We generated 50 pairs of datasets, each representing the case (class 1) and the control (class 0) conditions. Each dataset contains  $n_i (i = 1, 2)$  observations with  $p$  variables drawn from the multivariate normal distribution with mean 0 and covariance matrix  $\Sigma$ , that is,  $\mathbf{X} \sim N_p(\mathbf{0}, \Sigma)$ .  $\Sigma$  consists of 3 blocks along the diagonal.  $\Sigma = \text{diag}(\Sigma_1, \Sigma_2, \Sigma_3)$ ,  $\Sigma_1 = (\sigma_{ij})_{m \times m}$ ,  $\sigma_{ij} = \rho^{|i-j|}$  for  $i, j = 1, \dots, m$ ;  $m = 80$ ;  $\Sigma_2 = \Sigma_3 = (\sigma_{ij}^*)_{10 \times 10}$ . In class 0,  $p = 100$ ,  $\rho = 0.5$ ,  $\sigma_{ii}^* = 1$  for  $i = 1, \dots, 10$ ,  $\sigma_{ij}^* = 0$  for  $i \neq j$ ; Five percent variables in class 0 are randomly chosen to be missed, then for each missing variable five percent samples are randomly chosen to be missed. In class 1,  $p = 100$ ,  $\rho = 0.5$ ,  $\sigma_{ii}^* = 1$  for  $i = 1, \dots, 10$ ,  $\sigma_{ij}^* = 0.7$  for  $i \neq j$ .  $n_1 = n_2 = 300$ .

For all the methods mentioned in our manuscript, we first impute the missing value using the corresponding mean value of observed samples. Then, we ran all the methods to assess their performance. The results of classification are shown in Figure S8, it indicated that the proposed JDINAC has the best performance. Table S1 presents the TPR, TNR and TDR of the JDINAC, DiffCorr, DEDN and cPLR. It shows that JDINAC has the highest TDR and TPR, and acceptable TNR. It indicates that JDINAC performs well in the case with multidimensional outliers.

## 3. Simulation study in imbalanced case/control setting

We conducted simulation study in imbalanced case/control setting, to evaluate the optimal cut-off of predictions. We generated 50 pairs of datasets, each

representing the case (class 1) and the control (class 0) conditions. Each dataset contains  $n_i (i = 1, 2)$  observations with  $p$  variables drawn from the multivariate normal distribution with mean 0 and covariance matrix  $\Sigma$ , that is,  $\mathbf{X} \sim N_p(\mathbf{0}, \Sigma)$ .  $\Sigma$  consists of 3 blocks along the diagonal.  $\Sigma = \text{diag}(\Sigma_1, \Sigma_2, \Sigma_3)$ ,  $\Sigma_1 = (\sigma_{ij})_{m \times m}$ ,  $\sigma_{ij} = \rho^{|i-j|}$  for  $i, j = 1, \dots, m$ ;  $m = 80$ ;  $\Sigma_2 = \Sigma_3 = (\sigma_{ij}^*)_{10 \times 10}$ . In class 0,  $p = 100$ ,  $\rho = 0.5$ ,  $\sigma_{ii}^* = 1$  for  $i = 1, \dots, 10$ ,  $\sigma_{ij}^* = 0$  for  $i \neq j$ ; in class 1,  $p = 100$ ,  $\rho = 0.5$ ,  $\sigma_{ii}^* = 1$  for  $i = 1, \dots, 10$ ,  $\sigma_{ij}^* = 0.7$  for  $i \neq j$ .

The maximum value of Youden index (also called Youden's  $J$  statistic,  $J = \text{Sensitivity} + \text{Specificity} - 1$ ) was used as a criterion for selecting the optimum cut-off point. Table S2 shows the optimal cut-off point for all methods, as expected, 0.5 is not the optimal cut-off point. Furthermore, Figure S9 described the corresponding ROC curves. Different criteria can lead to different optimal cut off in real word scenario, Youden index puts equal weights to the sensitivity and specificity. In some special diagnostic tests, sensitivity is more important than specificity, more weight should be given to sensitivity.

#### 4. BRCA dataset

The BRCA RNASeq Version 2 expression data and clinical data were obtained through the standard RNASeq data processing pipeline of software TCGA-Assembler. First, download the raw BRCA patients' RNA expression data through TCGA-Assembler downloading module. Specifically, in our work, we used the RNASeqV2 normalized gene expression data, which uses MapSplice to do the alignment and RSEM to perform the quantization. After getting the raw data downloaded, with the TCGA-Assembler RNASeqV2 normalized gene expression data processing module, we extract the normalized count values as our training data and test data. For detailed data description, please refer to NIH NCI (National Cancer Institute) Wiki. Screening method was used to shrink the candidate gene pair numbers before applying JDINAC. In this study, we only used the data of 114 patients who have both tumor and matched normal samples. The patients' ID are listed as follows,

|       |              |              |              |              |              |
|-------|--------------|--------------|--------------|--------------|--------------|
| [1]   | TCGA-BH-A0B7 | TCGA-BH-A0BW | TCGA-BH-A0B2 | TCGA-BH-A0H5 | TCGA-BH-A0DL |
| [6]   | TCGA-BH-A18N | TCGA-BH-A18P | TCGA-E2-A158 | TCGA-BH-A0BS | TCGA-BH-A0BT |
| [11]  | TCGA-BH-A18J | TCGA-BH-A18S | TCGA-BH-A18K | TCGA-BH-A18L | TCGA-BH-A18M |
| [16]  | TCGA-BH-A18U | TCGA-BH-A18V | TCGA-E2-A153 | TCGA-BH-A18Q | TCGA-BH-A18R |
| [21]  | TCGA-E2-A15M | TCGA-BH-A0BZ | TCGA-BH-A0C3 | TCGA-BH-A0DD | TCGA-BH-A0AZ |
| [26]  | TCGA-BH-A1EO | TCGA-BH-A1ET | TCGA-BH-A1EU | TCGA-BH-A1EV | TCGA-BH-A1EW |
| [31]  | TCGA-E2-A15I | TCGA-BH-A1EN | TCGA-BH-A1F2 | TCGA-BH-A1F6 | TCGA-BH-A1FM |
| [36]  | TCGA-BH-A0B5 | TCGA-BH-A0DG | TCGA-BH-A0DV | TCGA-E2-A1L7 | TCGA-E2-A1LB |
| [41]  | TCGA-E9-A1NA | TCGA-E9-A1ND | TCGA-BH-A1F0 | TCGA-E2-A1IG | TCGA-BH-A1FU |
| [46]  | TCGA-BH-A1FN | TCGA-E2-A1LH | TCGA-E9-A1N5 | TCGA-E9-A1N6 | TCGA-BH-A1F8 |
| [51]  | TCGA-BH-A1FC | TCGA-BH-A1FH | TCGA-BH-A0HA | TCGA-BH-A0E0 | TCGA-BH-A0E1 |
| [56]  | TCGA-BH-A0H7 | TCGA-BH-A0HK | TCGA-BH-A1FR | TCGA-A7-A13G | TCGA-E9-A1N9 |
| [61]  | TCGA-E9-A1NF | TCGA-A7-A0D9 | TCGA-A7-A0DB | TCGA-A7-A0DC | TCGA-BH-A0AY |
| [66]  | TCGA-BH-A0B3 | TCGA-BH-A0B8 | TCGA-BH-A0BC | TCGA-BH-A0BJ | TCGA-BH-A0BM |
| [71]  | TCGA-BH-A0BV | TCGA-BH-A0C0 | TCGA-BH-A0DH | TCGA-BH-A0DK | TCGA-BH-A0DP |
| [76]  | TCGA-BH-A0DQ | TCGA-E9-A1RB | TCGA-E9-A1RC | TCGA-E9-A1RD | TCGA-E9-A1RF |
| [81]  | TCGA-E9-A1N4 | TCGA-E9-A1NG | TCGA-AC-A2FB | TCGA-AC-A2FF | TCGA-E9-A1R7 |
| [86]  | TCGA-AC-A23H | TCGA-BH-A204 | TCGA-BH-A208 | TCGA-BH-A203 | TCGA-E9-A1RH |
| [91]  | TCGA-BH-A1FD | TCGA-BH-A1FE | TCGA-BH-A1FG | TCGA-BH-A1FJ | TCGA-E9-A1RI |
| [96]  | TCGA-BH-A209 | TCGA-E2-A1LS | TCGA-GI-A2C8 | TCGA-BH-A0BQ | TCGA-BH-A0DT |
| [101] | TCGA-BH-A0DO | TCGA-A7-A13E | TCGA-A7-A13F | TCGA-BH-A0AU | TCGA-BH-A1FB |
| [106] | TCGA-BH-A0BA | TCGA-GI-A2C9 | TCGA-AC-A2FM | TCGA-BH-A0DZ | TCGA-E2-A15K |
| [111] | TCGA-A7-A0CE | TCGA-A7-A0CH | TCGA-E2-A1BC | TCGA-BH-A0H9 |              |

## Supplementary Figures

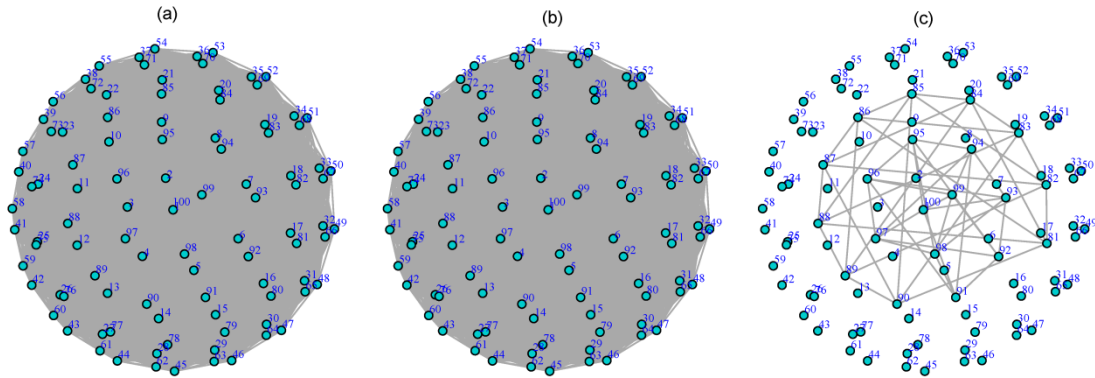

**Fig. S1. The networks of simulation scenario 1.** (a) The network of class 0; (b) The network of class 1; (c) The differential network. The edges in (a) and (b) indicate the two linked nodes are correlated. An edge in the differential network represent that the correlation between two given nodes are different across the two classes.

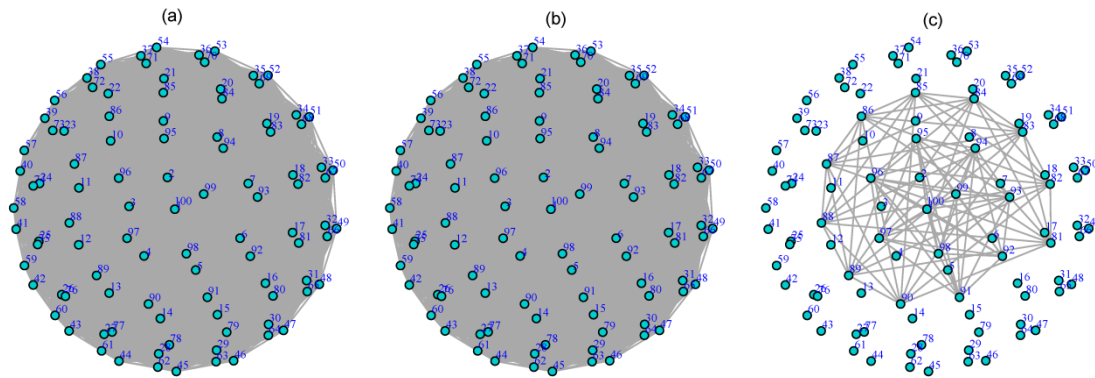

**Fig. S2. The networks of simulation scenario 2.** (a) The network of class 0; (b) The network of class 1; (c) The differential network. The edges in (a) and (b) indicate the two linked nodes are correlated. An edge in the differential network represent that the correlation between two given nodes are different across the two classes.

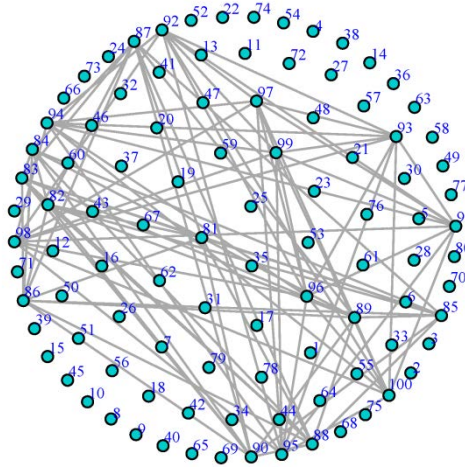

**Fig. S3. The differential network of simulation scenario 3.** An edge in the network represent that the joint density of two given nodes are different across the two classes.

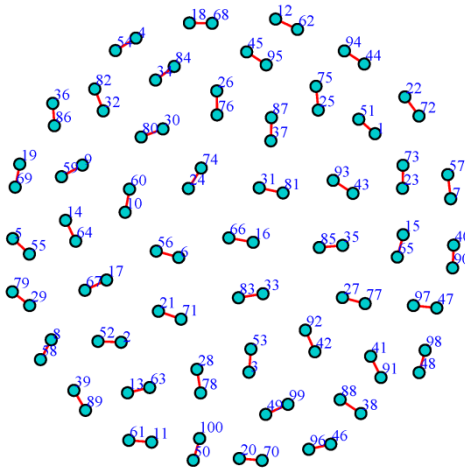

**Fig. S4. The differential network of simulation scenario 4.** An edge in the network represent that the dependency between two given nodes are different across the two classes.

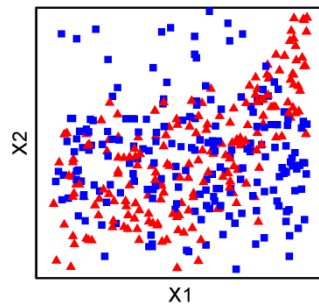

**Fig. S5. The non-linear scenario.** The blue square and red triangle represents the scatter plots for the two variables in class 0 and class 1 respectively, the two variables are independent in one group and have exponential relationship in the other group. (see Supplementary Methods 1)

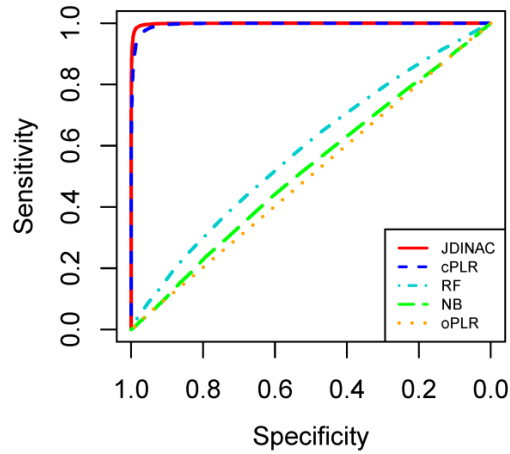

**Fig. S6. The ROC curves in the non-linear scenario.** (see Supplementary Methods 1)

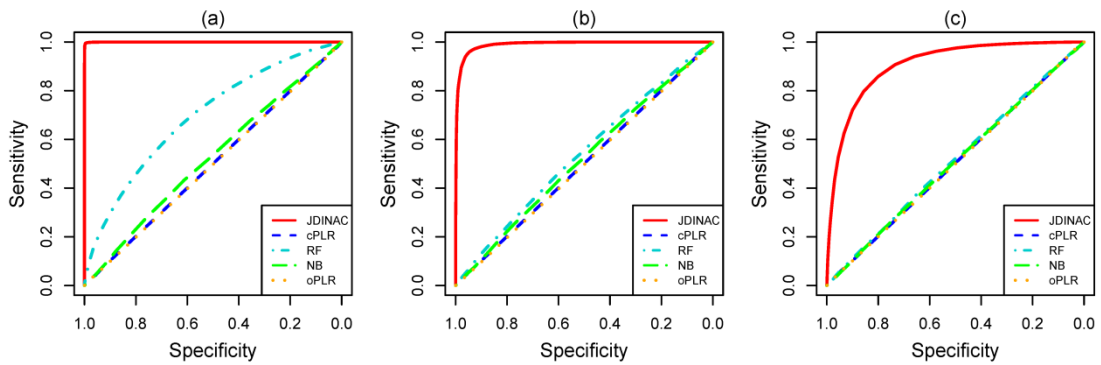

**Fig. S7. ROC curves of 5 methods for the classification in the non-linear scenario with different variance.** (a)  $v_j \sim N(-4/3, 1)$ ; (b)  $v_j \sim N(-4/3, 1.5)$ ; (c)  $v_j \sim N(-4/3, 2)$ . (see Supplementary Methods 1)

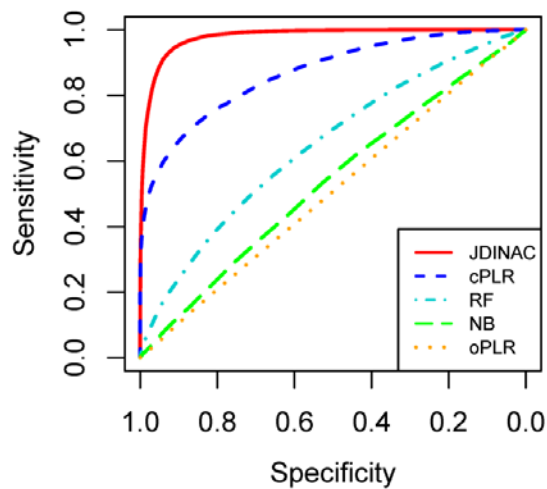

**Fig. S8. ROC curves of 5 methods for the classification with multidimensional outliers.** (see Supplementary Methods 2)



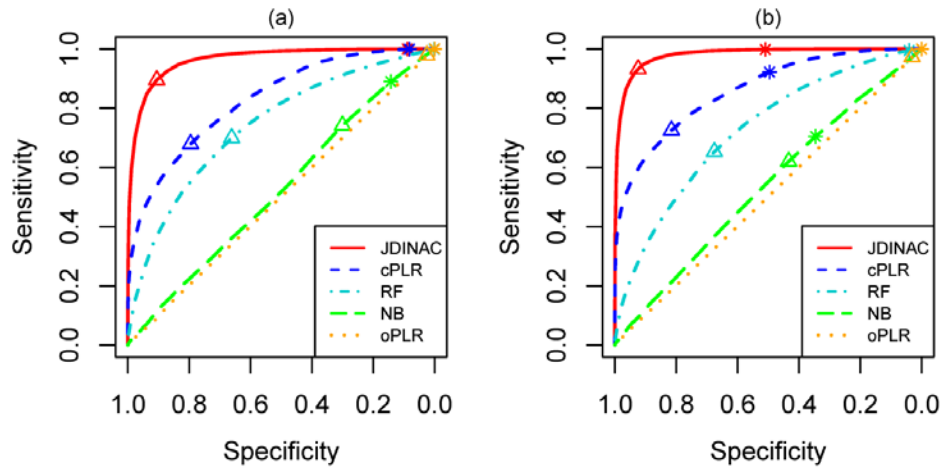

**Fig. S9. ROC curves of 5 methods for the classification.** (a) sample size  $n_0=100$ ,  $n_1=500$ ; (b) sample size  $n_0=200$ ,  $n_1=400$ . The asterisk indicates the location where the cutoff of prediction was set to 0.5. The triangle indicates the optimal cutoff point obtained by maximum Youden index. (see Supplementary Methods 3)

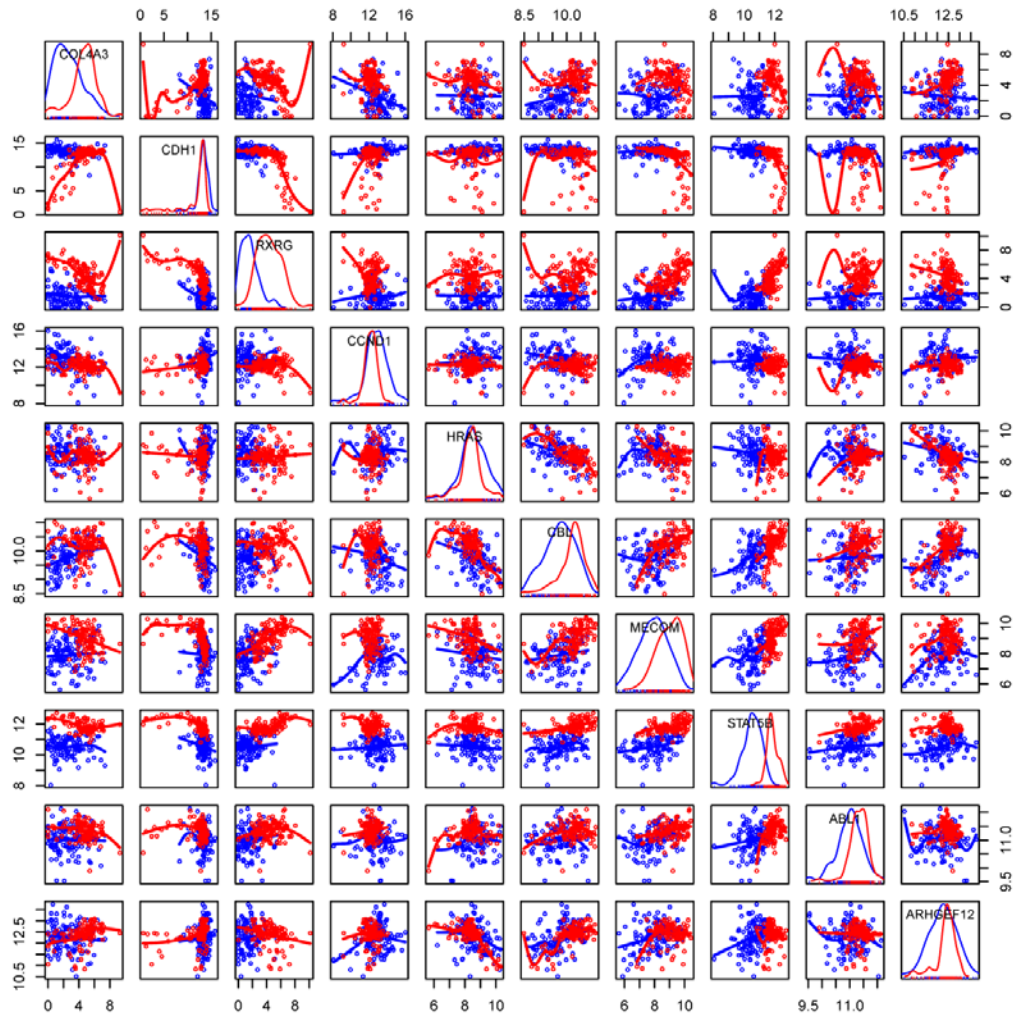

**Fig. S10. Scatterplot matrix of 10 genes.** The diagonal panel of the matrix is the kernel density curve of individual gene. The  $i$ -th row and  $j$ -th column of the matrix is the pairwise scatter plot and smooth curve fitted by a generalized additive model. The blue and red represents tumor group and control group respectively. (see Supplementary Methods 1)

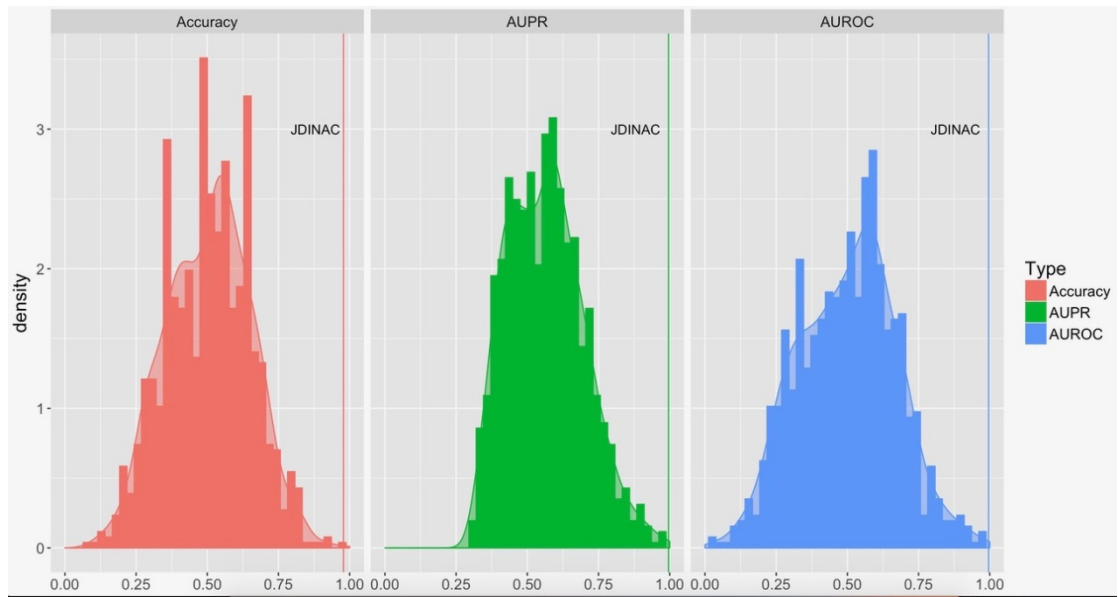

**Fig. S11. Y-randomization result of JDINAC classification model of BRCA case and control.** The area under the ROC curve (AUROC), the area under the precision-recall curve (AUPR).

## Supplementary Tables

**Table S1.** The TPR, TNR and TDR of different methods. (average of 50 replications, %), The best performance is highlighted in bold. (see Supplementary Methods 2)

| Methods               | TDR          | TPR           | TNR          |
|-----------------------|--------------|---------------|--------------|
| JDINAC <sup>a</sup>   | <b>99.20</b> | 73.38         | <b>99.99</b> |
| DiffCorr <sup>b</sup> | 89.74        | <b>100.00</b> | 99.79        |
| DEDN                  | 13.84        | 89.71         | 93.16        |
| cPLR                  | 40.87        | 47.82         | 98.60        |

a. Pair  $(G_i, G_j)$  was taken as differential edge in the network for JDINAC, when the differential dependency weight  $w_{ij} \geq 4$ .

b. Set to control the false discovery rate equal to 0.1.

**Table S2.** The optimal cutoff point obtained by maximum Youden index. (see Supplementary Methods 3)

|                    | JDINAC | cPLR | RF   | NB   | oPLR |
|--------------------|--------|------|------|------|------|
| $n_0=100, n_1=500$ | 0.83   | 0.83 | 0.80 | 0.52 | 0.79 |
| $n_0=200, n_1=400$ | 0.67   | 0.65 | 0.65 | 0.51 | 0.63 |

**Table S3.** The overlapped edges between different methods.

| Methods           | Overlap edges                                                                                                                                                                                                                                                      |
|-------------------|--------------------------------------------------------------------------------------------------------------------------------------------------------------------------------------------------------------------------------------------------------------------|
| JDINAC & cPLR     | <i>LEF1--FOXO1, TPM3--CKS1B, RXRG--LAMA3, COL4A6--AGTR1, LAMC1--FGF1, TGFBR2--LEF1</i>                                                                                                                                                                             |
| JDINAC & DiffCorr | <i>EGFR--AR, LAMC2--CBLC, GSTP1--EGFR, WNT7B--LAMC2, ARNT2--AGTR1, TGFB3--RUNX1T1, FZD7--CTBP2, TGFB3--FOXO1, COL4A6--CBLC, LAMC2--CDK2, TGFA--COL4A6, PDGFA--FOXO1, TGFBR2--GNG7, GNB5--FGFR2, GNG7--FZD4, PDGFA--FZD4, PDGFA--GNG2, JUP--GNG7, TGFBR2--PDGFA</i> |
| DiffCorr & cPLR   | <i>KIT--CDH1, TCF7--CDH1, RUNX1--CDK2, FZD4--ERBB2, PDGFA--ETS1, LAMA4--FGF1, JUP--FZD7, LAMA4--FZD7, LAMC1--FZD7, LPAR2--FZD7, TP53--FZD7, PDGFA--JUP, LPAR3--LEF1, VEGFB--LEF1</i>                                                                               |

**Table S4.** The overlapped GO terms and KEGG pathway among different methods.

| ID         | Functional term                             | Category | JDINAC                       | DiffCorr                     | cPLR                         |
|------------|---------------------------------------------|----------|------------------------------|------------------------------|------------------------------|
|            |                                             |          | <i>p</i> -value (count/size) | <i>p</i> -value (count/size) | <i>p</i> -value (count/size) |
| GO:0031581 | hemidesmosome assembly                      | BP       | 0.006212655 (4/74)           | 0.04962503 (4/128)           | 0.04805773 (3/70)            |
| GO:0005198 | structural molecule activity                | MF       | 0.01694874 (9/74)            | 0.004009204 (14/128)         | 0.0026791628 (10/70)         |
| GO:0005201 | extracellular matrix structural constituent | MF       | 0.03082378 (5/74)            | 0.003969823(8/128)           | 0.0004478932 (7/70)          |
| GO:0005604 | basement membrane                           | CC       | 0.002956678 (10/74)          | 0.02389143 (12/128)          | 0.001859320 (10/70)          |
| GO:0005605 | basal lamina                                | CC       | 0.005858540 (7/74)           | 0.03905771 (8/128)           | 0.004174482 (7/70)           |
| GO:0044420 | extracellular matrix component              | CC       | 0.002956678 (10/74)          | 0.02389143 (12/128)          | 0.001859320 (10/70)          |
| GO:0044421 | extracellular region part                   | CC       | 0.005011179 (37/74)          | 0.03430913 (55/128)          | 0.013529227 (34/70)          |
| hsa04512   | ECM-receptor interaction                    | pathway  | 0.01352785 (10/74)           | 0.006079814 (15/128)         | 0.0005460853 (12/70)         |

**Table S5.** Hub genes identified by JDINAC

| Methods  | Hub genes (number of neighbor genes)                                                                                                                                                                                                                                                                                                                                                                                                                                                                                                                                                                                                                                                                                                |
|----------|-------------------------------------------------------------------------------------------------------------------------------------------------------------------------------------------------------------------------------------------------------------------------------------------------------------------------------------------------------------------------------------------------------------------------------------------------------------------------------------------------------------------------------------------------------------------------------------------------------------------------------------------------------------------------------------------------------------------------------------|
| JDINAC   | <i>FGF1</i> (8), <i>TGFB3</i> (8), <i>ARNT2</i> (7), <i>LAMA3</i> (6), <i>LAMC2</i> (6), <i>PDGFA</i> (5), <i>EGFR</i> (4), <i>FOXO1</i> (4), <i>FZD7</i> (4), <i>LEF1</i> (4), <i>WNT6</i> (4)                                                                                                                                                                                                                                                                                                                                                                                                                                                                                                                                     |
| DiffCorr | <i>CBLC</i> (27), <i>TRAF4</i> (27), <i>FZD3</i> (26), <i>TGFA</i> (25), <i>FZD7</i> (24), <i>HDAC1</i> (24), <i>ERBB2</i> (23), <i>MAP2K1</i> (23), <i>PDGFA</i> (23), <i>CTBP2</i> (22), <i>FZD4</i> (21), <i>LPAR2</i> (21), <i>JUP</i> (20), <i>RUNX1</i> (20), <i>CDK2</i> (19), <i>FZD1</i> (19), <i>VEGFB</i> (19), <i>KIT</i> (18), <i>LAMA4</i> (18), <i>CDH1</i> (17), <i>COL4A5</i> (17), <i>COL4A6</i> (17), <i>ITGA2</i> (16), <i>CDKN2B</i> (15), <i>GNAI1</i> (15), <i>GNG7</i> (15), <i>TCF7</i> (15), <i>GNB5</i> (14), <i>ITGA3</i> (14), <i>TP53</i> (14), <i>WNT10A</i> (14), <i>LPAR3</i> (13), <i>IGF1R</i> (12), <i>WNT7B</i> (12), <i>GNG11</i> (11), <i>GNG2</i> (11), <i>JAK1</i> (11), <i>LAMA3</i> (11) |
| cPLR     | <i>LEF1</i> (6), <i>FZD7</i> (5), <i>KIT</i> (5), <i>JUP</i> (4), <i>LAMA4</i> (4), <i>WNT10A</i> (4)                                                                                                                                                                                                                                                                                                                                                                                                                                                                                                                                                                                                                               |
